# Supplementary material
Source: bioRxiv or medRxiv preprint supplement (http://medrxiv.org/highwire/filestream/79248/field_highwire_adjunct_files/5/2020.04.30.20086884-2.pdf)
Supplement: Supplementary file [file 2020.04.30.20086884-2.pdf]

| Jurisdiction   | Cumulative cases | Jurisdiction         | Cumulative cases |
|----------------|------------------|----------------------|------------------|
| California     | 56223            | Kentucky             | 5954             |
| Texas          | 37125            | Oregon               | 3097             |
| Florida        | 49450            | Oklahoma             | 4914             |
| New York       | 507107           | Connecticut          | 42796            |
| Pennsylvania   | 67550            | Iowa                 | 6858             |
| Illinois       | 54913            | Utah                 | 5859             |
| Ohio           | 24833            | Nevada               | 7214             |
| Georgia        | 37870            | Arkansas             | 3608             |
| North Carolina | 13009            | Mississippi          | 8935             |
| Michigan       | 62848            | Kansas               | 4086             |
| New Jersey     | 185404           | New Mexico           | 3862             |
| Virginia       | 18150            | Nebraska             | 3599             |
| Washington     | 18850            | West Virginia        | 1422             |
| Arizona        | 8284             | Idaho                | 2664             |
| Massachusetts  | 85620            | Hawaii               | 888              |
| Tennessee      | 13030            | New Hampshire        | 2726             |
| Indiana        | 22756            | Maine                | 1512             |
| Missouri       | 10490            | Montana              | 659              |
| Maryland       | 28427            | Rhode Island         | 11853            |
| Wisconsin      | 8308             | Delaware             | 6051             |
| Colorado       | 19747            | South Dakota         | 3500             |
| Minnesota      | 4166             | North Dakota         | 1205             |
| South Carolina | 7832             | Alaska               | 592              |
| Alabama        | 10411            | District of Columbia | 6172             |
| Louisiana      | 45734            | Vermont              | 1544             |
|                |                  | Wyoming              | 640              |

**S2 Table Final cumulative case incidence for all states.** The predicted cumulative case incidence for all states shows significant variability across states.
